# Supplementary material for: Study protocol for a multicentre randomised controlled trial evaluating the efficacy of an online yoga intervention in high-grade glioma patients and their caregivers: the YINOTA-O-trial
Source: HighWire-hosted journal article supplement (doi:10.1136/bmjopen-2023-075698), 2024-10-01
Supplement: bmjopen-2023-075698supp001_data_supplement.pdf [file bmjopen-2023-075698supp001_data_supplement.pdf]

Table 1. Trial registration data

| Data category                                 | Information                                                                                                                                                                                                                                                                                                                                                                                    |
|-----------------------------------------------|------------------------------------------------------------------------------------------------------------------------------------------------------------------------------------------------------------------------------------------------------------------------------------------------------------------------------------------------------------------------------------------------|
| Primary registry and trial identifying number | DRKS-ID: DRKS00029554                                                                                                                                                                                                                                                                                                                                                                          |
| Date of registration in primary registry      | 22 August 2022                                                                                                                                                                                                                                                                                                                                                                                 |
| Source(s) of monetary or material support     | University Hospital Würzburg, Comprehensive Cancer Center Mainfranken; institutional budgeted/no external funding                                                                                                                                                                                                                                                                              |
| Primary sponsor                               | University Hospital Würzburg, Comprehensive Cancer Center Mainfranken                                                                                                                                                                                                                                                                                                                          |
| Contact for public queries                    | Dr. Elisabeth Jentschke (Jentschke_E@ukw.de)                                                                                                                                                                                                                                                                                                                                                   |
| Contact for scientific queries                | Dr. Elisabeth Jentschke (Jentschke_E@ukw.de)                                                                                                                                                                                                                                                                                                                                                   |
| Public and scientific title                   | Efficacy of an online yoga-intervention in patients with a brain-derived tumor of WHO grades 3 & 4 and their caregivers                                                                                                                                                                                                                                                                        |
| Countries of recruitment                      | Germany                                                                                                                                                                                                                                                                                                                                                                                        |
| Health condition(s) or problem(s) studied     | Brain-derived tumors (WHO grades 3 & 4)                                                                                                                                                                                                                                                                                                                                                        |
| Intervention(s)                               | Study group: online yoga intervention<br>Waiting control group: online yoga intervention after eight weeks of waiting                                                                                                                                                                                                                                                                          |
| Key inclusion and exclusion criteria          | Inclusion criteria: Patients with a brain-derived tumor (WHO grades 3 &4, initial diagnosis and/or recurrent disease, 6 weeks after surgery at the earliest) and their caregivers, male and female, age of 18-years or older, regular access to a computer with internet access<br>Exclusion criteria: Lack of German language abilities, severe cognitive, affective and physical limitations |
| Study type                                    | Interventional<br>Allocation: randomized<br>Primary purpose: supportive care                                                                                                                                                                                                                                                                                                                   |
| Date of first enrolment                       | Enrollment is scheduled for the first quarter of 2024                                                                                                                                                                                                                                                                                                                                          |
| Target sample size                            | 140                                                                                                                                                                                                                                                                                                                                                                                            |
| Recruitment status                            | Recruiting planned                                                                                                                                                                                                                                                                                                                                                                             |
| Primary outcome(s)                            | Anxiety (GAD-7) after intervention                                                                                                                                                                                                                                                                                                                                                             |
| Key secondary outcomes                        | Progression anxiety (PA-F-KF), quality of life (EORTC QLQ C30 + BN20), depression (PHQ-9), BDNF, DHEA/DHEAS, ferritin and hair cortisol after intervention and 3 months after the end of the intervention                                                                                                                                                                                      |
